# Supplementary material for: Pooled screening of CAR T cells identifies diverse immune signaling domains for next-generation immunotherapies
Source: PubMed Central journal article supplement (PMC9939256; doi:10.1126/scitranslmed.abm1463), 2022-11-09
Supplement: NIHMS1869253-supplement-1.pdf [file NIHMS1869253-supplement-1.pdf]

1 **Supplementary Materials for**

2  
3 Pooled screening of CAR T cells identifies diverse immune signaling domains for next-  
4 generation immunotherapies

5  
6 Daniel B. Goodmant, Camillia S. Azimit, Kendall Kearns, Alexis Talbot, Kiavash Garakani, Julie  
7 Garcia, Nisarg Patel, Byungjin Hwang, David Lee, Emily Park, Vivasvan S. Vykunta, Brian R.  
8 Shy, Chun Jimmie Ye, Justin Eyquem, Alexander Marson, Jeffrey A. Bluestone, Kole T. Roybal\*

9  
10 Correspondence to: [kole.roybal@ucsf.edu](mailto:kole.roybal@ucsf.edu)

11  
12  
13 **This PDF file includes:**

14  
15 Figs. S1 to S7

16 Table S1 and S2

17 Legend for data file S1 and S2

Figure S1

A

Exhaustion Marker dynamics, in vitro repetitive stimulation

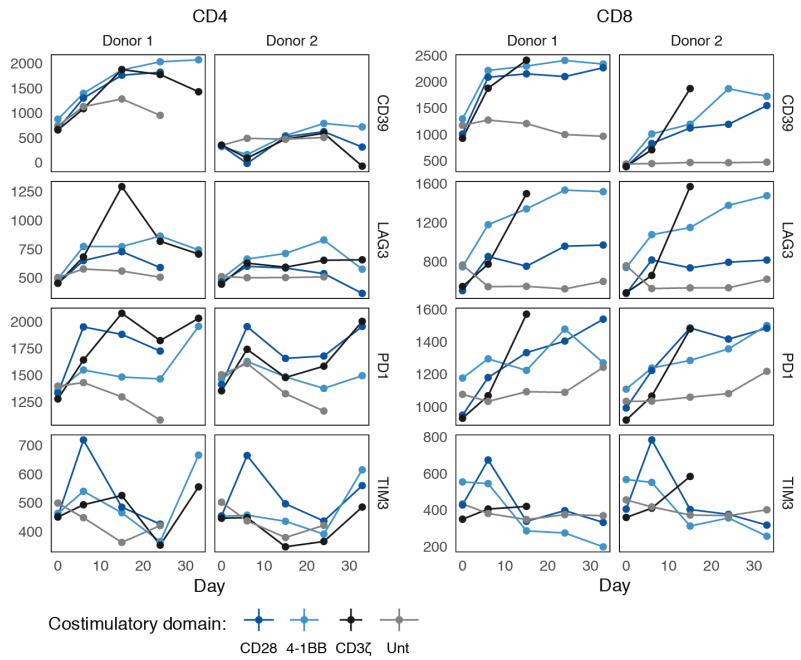

B

Cumulative Exh. Marker % Positive

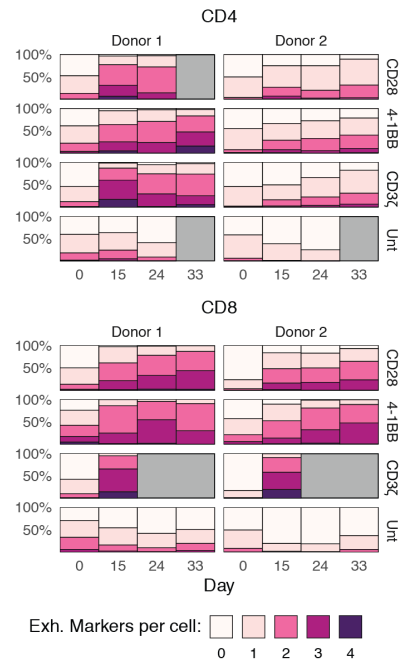

C

Costimulatory domain rankings, Average vs individual replicates

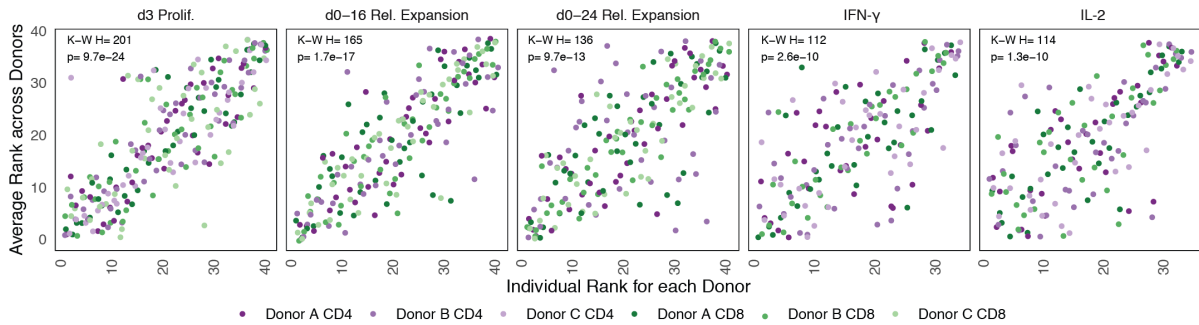

D

No correlation between abundance, domain size and proliferation/expansion

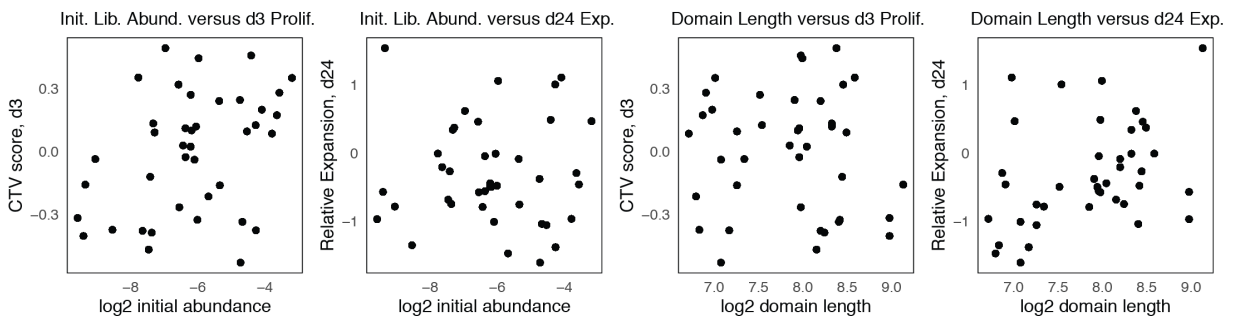

1

2

1 **Fig. S1. Repetitive stimulation reproducibly induces exhaustion.**  
2 **(A)** Mean fluorescence intensity (MFI) for four cell surface markers of exhaustion (CD39,  
3 lymphocyte activating protein 3 (LAG3), programmed cell death protein 1 (PD1), T cell  
4 immunoglobulin domain and mucin domain 3 (TIM3)) in anti-CD19 chimeric antigen receptor  
5 (CAR) T cells generated from two donors measured after repeated stimulation with CD19-  
6 expressing irradiated K562 cells. CARs contained either 4-1BB or CD28 costimulation domains,  
7 no costimulatory domain (CD3 $\zeta$  only), or were untransduced (Unt) T cells from the same donor  
8 as a control. **(B)** Aggregated measurements for panel (A) are shown, displayed as the percentage  
9 of cells expressing 0 to 4 exhaustion (Exh.) markers, for each donor, timepoint, and CAR. **(C)**  
10 Rank ordering of all 40 CARs within multiple assays is shown, with average rank for donor as  
11 well as CD4 and CD8 replicates plotted against the rank within the individual donors and T cell  
12 subsets. Proliferation (Prolif.), relative (Rel.) expansion, interferon (IFN)- $\gamma$  production, and  
13 interleukin (IL)-2 production are shown. A Kruskal Wallis H test was performed for each assay,  
14 and the H statistic and p-value are shown. The upper right and lower left (lowest- and highest-  
15 ranked domains) are the most consistently ranked among individual replicates. **(D)** Initial library  
16 abundance (Init. Lib. Abund.) of each CAR (as a log<sub>2</sub> fraction of the total read count) and  
17 domain length (log<sub>2</sub> of the number of nucleotides) plotted versus either the Cell Trace Violet  
18 (CTV) score on day 3 (representing early proliferation) or the long-term expansion, log<sub>2</sub>-  
19 transformed and normalized to the average library member. None of these plots show any  
20 statistically significant correlation between either initial library abundance or costimulatory  
21 domain size and domain performance.

Figure S2

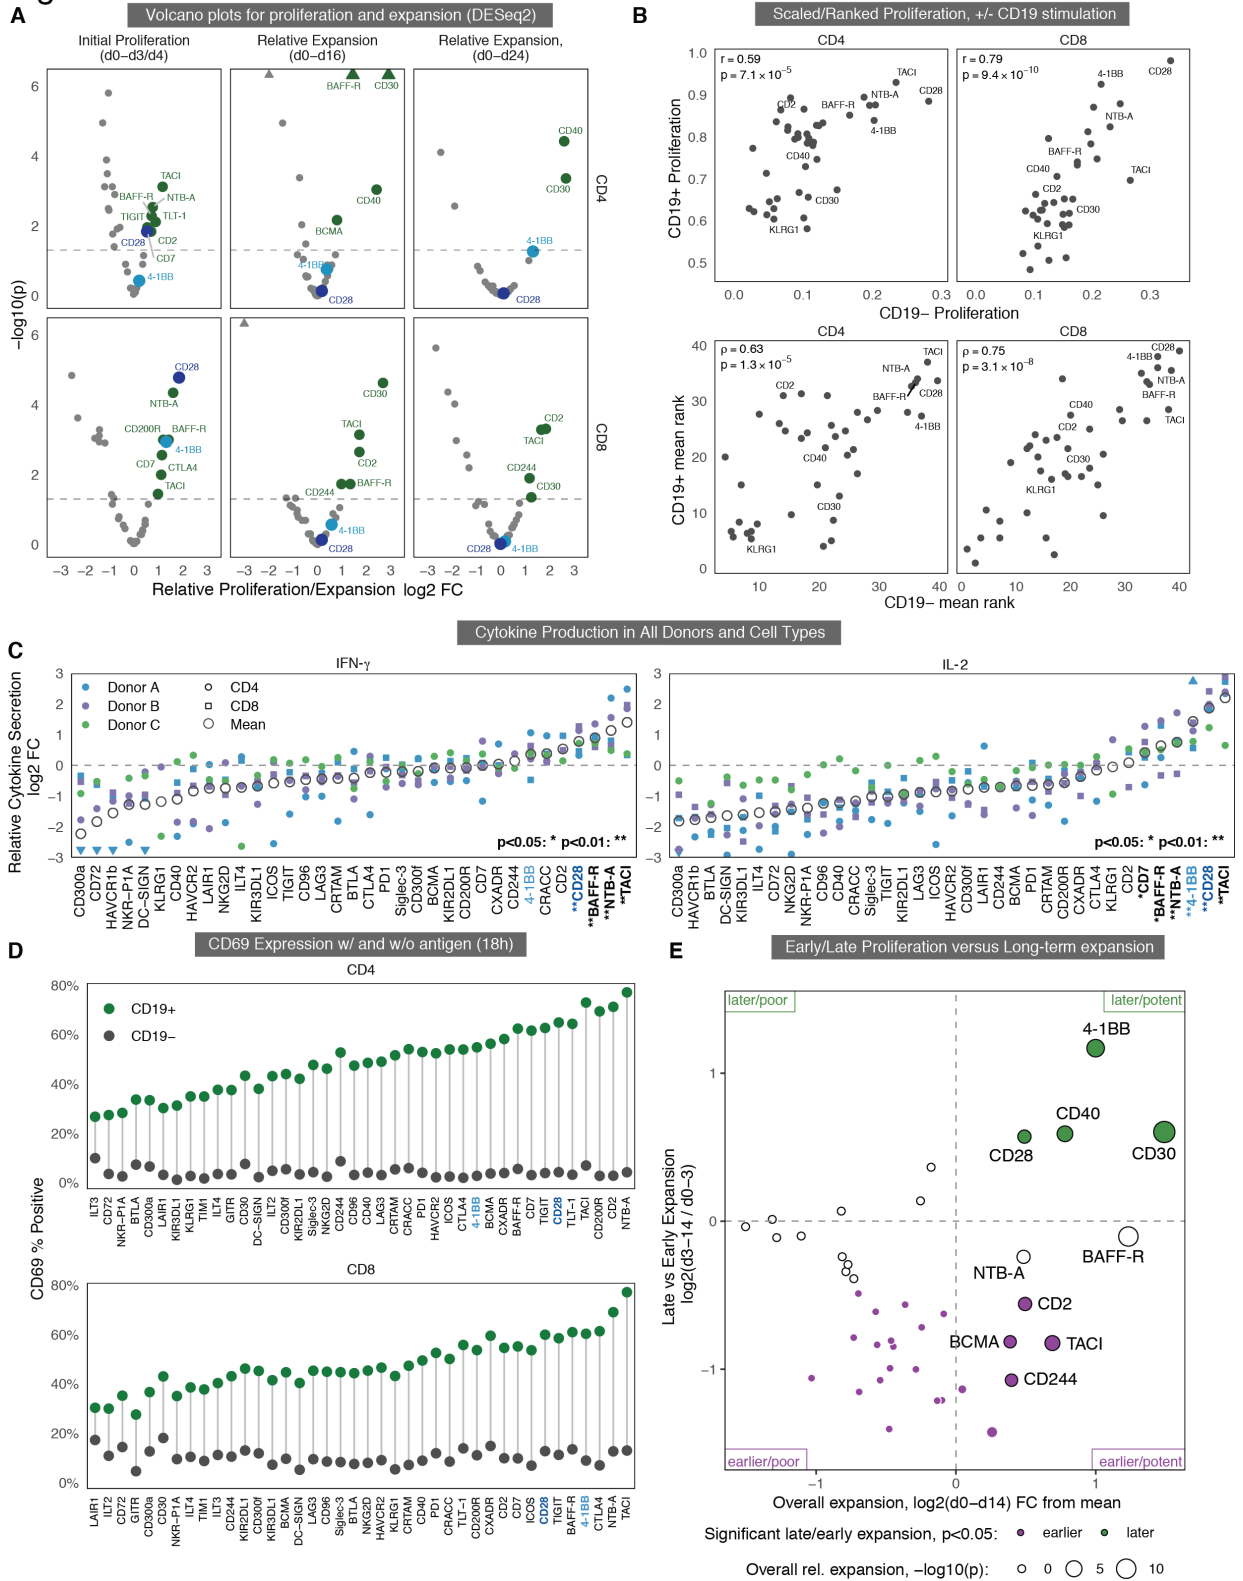

1 **Fig. S2. Additional data and statistical correlations for the differential activation,**  
2 **proliferation, and long-expansion in a library of CAR-T costimulatory domain variants.**  
3 **(A)** Volcano plots showing the relative proliferation or expansion (according to panel labels) of  
4 CD4 or CD8 T cells expressing CARs containing different costimulatory domains, during the  
5 repetitive stimulation assay with CD19+ K562 cells. The x-axis shows the calculated difference in  
6 log<sub>2</sub>-fold change (FC) in proliferation or expansion, and the y-axis shows the associated adjusted  
7 P-value, as calculated by the DESeq2 algorithm. BAFF-R, B cell activating factor receptor; TACI,  
8 Transmembrane activator calcium modulator and cyclophilin ligand interactor; TIGIT, T cell  
9 immunoreceptor with Ig and ITIM domains; NTB-A, NK-T-B-antigen; TLT-1, Triggering  
10 receptors expressed on myeloid cells-like transcript-1; BCMA, B-cell maturation antigen. **(B)** A  
11 comparison of CAR T cell proliferation from d0-d3 across the library with and without CD19  
12 stimulation. The top plots show the scaled proliferation averaged over each replicate but retain the  
13 differences in relative proliferation between CD19- and CD19+ conditions, which were measured  
14 simultaneously in our FlowSeq CTV assay. The bottom plots show the mean CAR rankings  
15 separately for the CD19- and CD19+ conditions. The top-performing potent costimulatory CARs  
16 are labeled. On the top, the y-axis is truncated due to the higher relative proliferation in the CD19+  
17 condition. **(C)** FlowSeq measurement of intracellular cytokine production are shown across library  
18 domains in CD4 and CD8 (circle, square) T cells across three independent human donors (blue,  
19 purple, green), 18 hours after the initial addition of CD19+/- irradiated K562 cells. Means of all  
20 conditions for each cytokine are indicated by an open circle. Domains labeled in bold with stars  
21 next to their name indicate significance using a Wilcoxon rank-sum test, FDR-corrected  $p < 0.05$ .  
22 HAVCR, Hepatitis A virus cellular receptor 1; NKR-P1A, natural killer cell surface protein P1A;  
23 KLRG1, killer cell lectin like receptor G1; LAIR1, leukocyte associated immunoglobulin like  
24 receptor 1; ILT4, immunoglobulin-like transcript 4; KIR, killer cell immunoglobulin-like receptor;  
25 ICOS, inducible T cell costimulator; CRTAM, cytotoxic and regulatory T cell molecule; BTLA,  
26 B and T lymphocyte attenuator; CTLA4, cytotoxic T-lymphocyte associated protein 4; CXADR,  
27 Coxsackie virus and adenovirus receptor; CRACC, CD2-like receptor activating cytotoxic cells.  
28 **(D)** FlowSeq measurement of the percentage of CD69+ cells is shown for each CAR library  
29 domain in both CD4 and CD8 cells, 18 hours after the addition of irradiated K562 cells either with  
30 or without CD19 expression. Cells are ranked based on the difference in percentage of CD69+  
31 cells between CD19+ and CD19- conditions. **(E)** A comparison of early versus late antigen-

1 stimulated proliferation is shown. The x- axis measures overall expansion by day 14 or 16 (d14/16)  
2 with more potent CARs on the right and less potent CARs on the left. The y-axis measures the  
3 ratio of late proliferation (d3 to d14) versus early proliferation (d0 to d3). CARs above 0 on the y-  
4 axis are more expanded in the library at later time points, and CARs below 0 are more expanded  
5 earlier. Domains significantly enriched earlier versus later during the expansion were colored  
6 purple and green, respectively. Significance of each domain's overall relative expansion indicated  
7 by size of circle (Wald test using DeSEQ2,  $-\log_{10}(p)$ ).

8

9

Figure S3

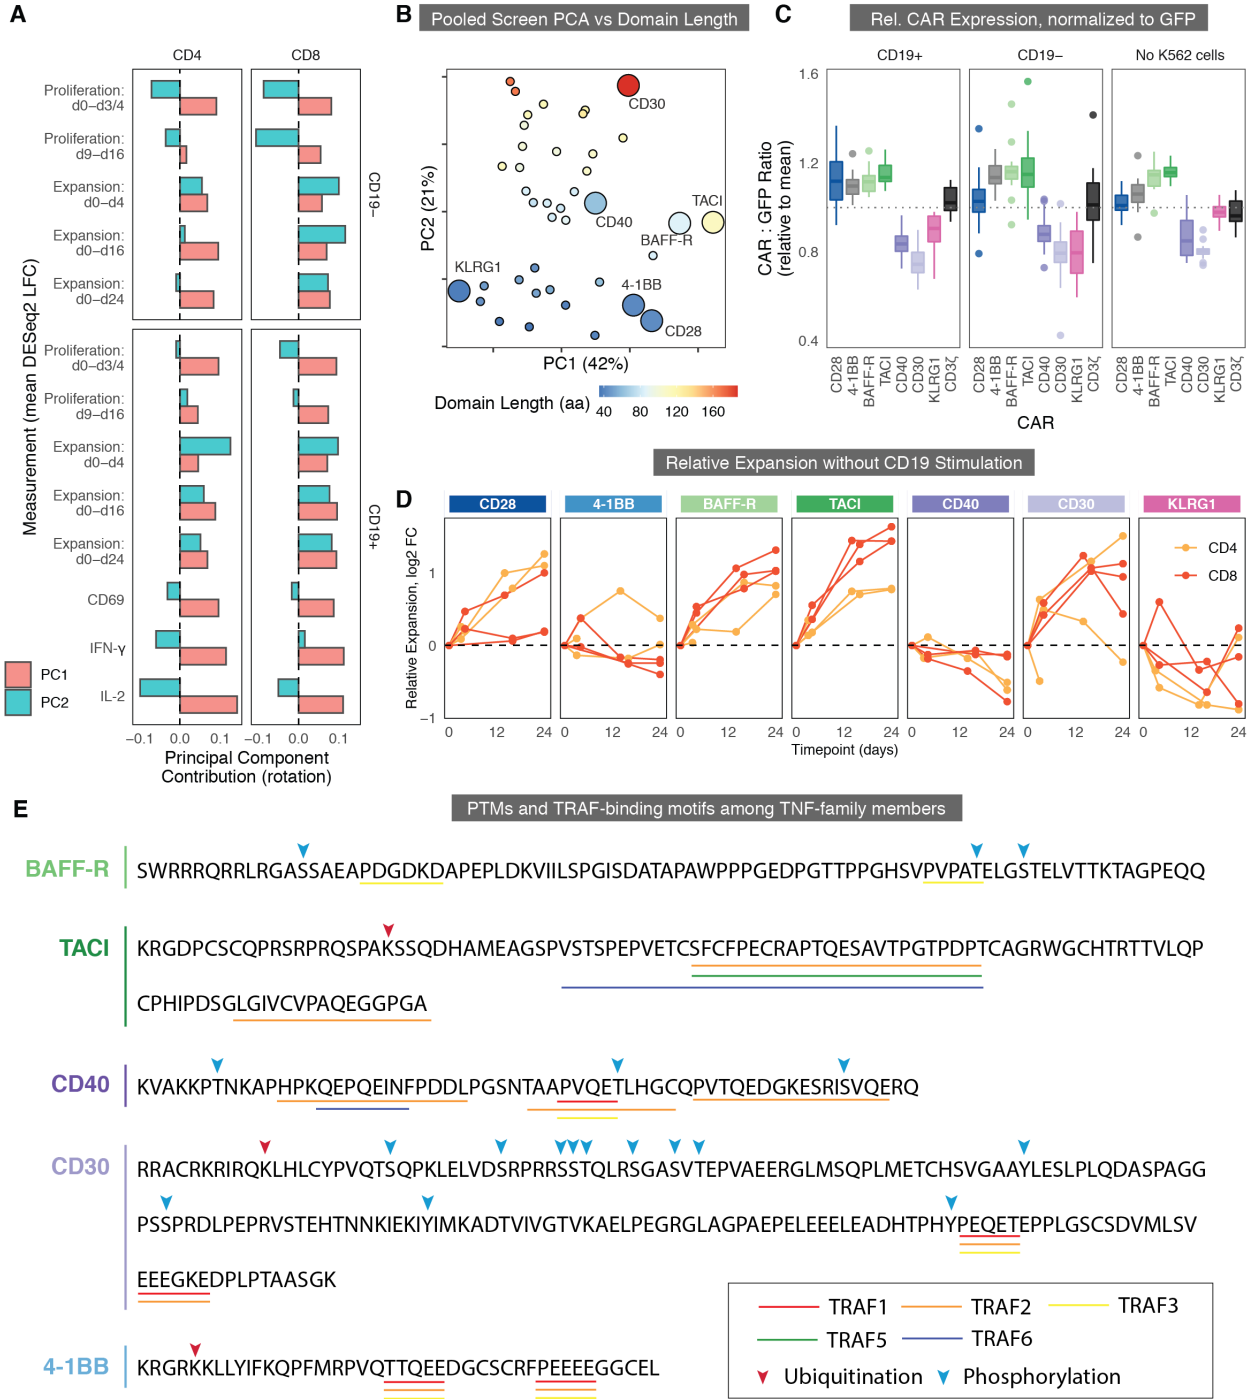

1

1 **Fig. S3. Functional characterization of costimulatory landscape and analysis of the**  
2 **composition of the principal components of CAR performance across our library.**

3 **(A)** The bar plots show the relative contributions of different measurement types (in CD4 T cells  
4 and CD8 T cells, with and without antigenic stimulation) to each principal component (PC) of the  
5 PC analysis (PCA) plot in Fig. 3B and fig. S3B. The y-axis indicates the mean log fold change  
6 (LFC) and the x-axis indicates the contribution of each PC. Contributions are grouped across donor  
7 replicates and separated out by different timepoints, proliferation (cell trace violet (CTV)  
8 FlowSeq), expansion (change in relative library abundance over time), intracellular cytokine  
9 FlowSeq, and activation (CD69 FlowSeq). PC1 (red) describes most of the variability in antigen-  
10 positive proliferation and expansion, and contributions to PC2 (blue) include early expansion (but  
11 not CTV-measured cell divisions), decreased CD4 cytokine secretion and reduced tonic signaling.  
12 **(B)** A recoloring of Fig. 3B is shown according to the amino acid length of each costimulatory  
13 domain, showing a slight correlation between domain length (blue to red is shortest to longest) and  
14 the second principal component, but not the first. **(C)** Ratio of surface CAR expression (using a  
15 myc tag and flow cytometry staining) to green fluorescent protein (GFP) fluorescence is shown  
16 for each CAR. All CAR variants were normalized to the mean within each time point, donor, and  
17 T cell type (CD4 or CD8). Expression with CD19+ K562 cells, CD19- K562 cells, and no target  
18 cells are shown separately. Box and whisker plots indicate median CAR:GFP ratio and variance  
19 as plotted by interquartile range, minimum, and maximum (excluding outliers plotted separately)  
20 for each measured CAR. **(D)** Relative expansion of library members CD28, 4-1BB, BAFF-R,  
21 TACI, CD40, CD30, and KLRG1 is shown over 24 days of repeated stimulation with irradiated  
22 CD19- K562 cells, as in Fig. 3C. Expansion was quantified by calculating the fold-change of the  
23 proportion of each CAR within the library at each timepoint (x-axis) as compared to baseline  
24 relative to the average CAR within the pooled library. The library was measured in CD4 and CD8  
25 primary human T cells individually in 2 to 3 biological replicates. **(E)** Amino acid sequence and  
26 motif analysis of selected library members' belonging to the tumor necrosis factor (TNF) receptor  
27 family. TNF receptor associated factor (TRAF) binding sites indicated with colored lines under  
28 amino acid sequence. Phosphorylation and ubiquitination sites as annotated by Phosphosite are  
29 indicated with blue and red downward arrows, respectively.





1 **Fig. S4. Proliferation, exhaustion, and differentiation characteristics of CARs with chosen**  
2 **costimulatory domains, and metabolism of CARs with chosen costimulatory domains.**  
3 **(A)** CTV flow cytometry histograms are shown, as in Fig. 4C, for both donors, all time points, and  
4 CD4 T cells. AU, arbitrary units. **(B)** CTV cytometry histograms are shown, as in Fig. 4C, for both  
5 donors, all time points and CD8 T cells. **(C)** Normalized relative metabolic mitochondrial  
6 dependence for CD4 and CD8 T cells was measured among select CARs. This metric is based on  
7 measurement of protein synthesis using the simple method for complex immune-metabolic  
8 profiling (SCENITH), which calculates the change in overall metabolic output with and without  
9 the addition of oligomycin, a mitochondrial inhibitor. **(D)** MFI for three cell surface markers of  
10 exhaustion (LAG3, PD1, and TIM3) is shown for anti-CD19 CAR T cells generated from two  
11 donors, measured after repeated stimulation with CD19+ irradiated K562 cells. **(E)** The proportion  
12 of CAR T cells expressing 0 to 3 of the exhaustion (Exh.) markers PD1, TIM3, and LAG3 after  
13 different numbers of days in culture is shown, as in Fig. 4F. **(F)** A table of significant differences  
14 in pairwise statistical tests based on a Repeated Measures ANOVA model is shown for mean  
15 exhaustion markers across different subtypes, donors, and days of measurement. FDR < 0.05:\*, <  
16 0.01:\*\*, < 0.001:\*\*\*, < 0.0001:\*\*\*\*, ns, not significant. **(G)** MFI of CD27 was measured across  
17 all T cells, timepoints, and CAR T variants, as in Fig. 4G. **(H)** Differentiation of T cells at different  
18 timepoints throughout the repeated stimulation assay was evaluated. Differentiation subsets  
19 [Naive, Central Memory (TCM), Effector Memory (TEM), and Effector Memory RA-positive  
20 (TEMRA)] were calculated using surface expression of CD45RA and CD62L,.

Figure S5

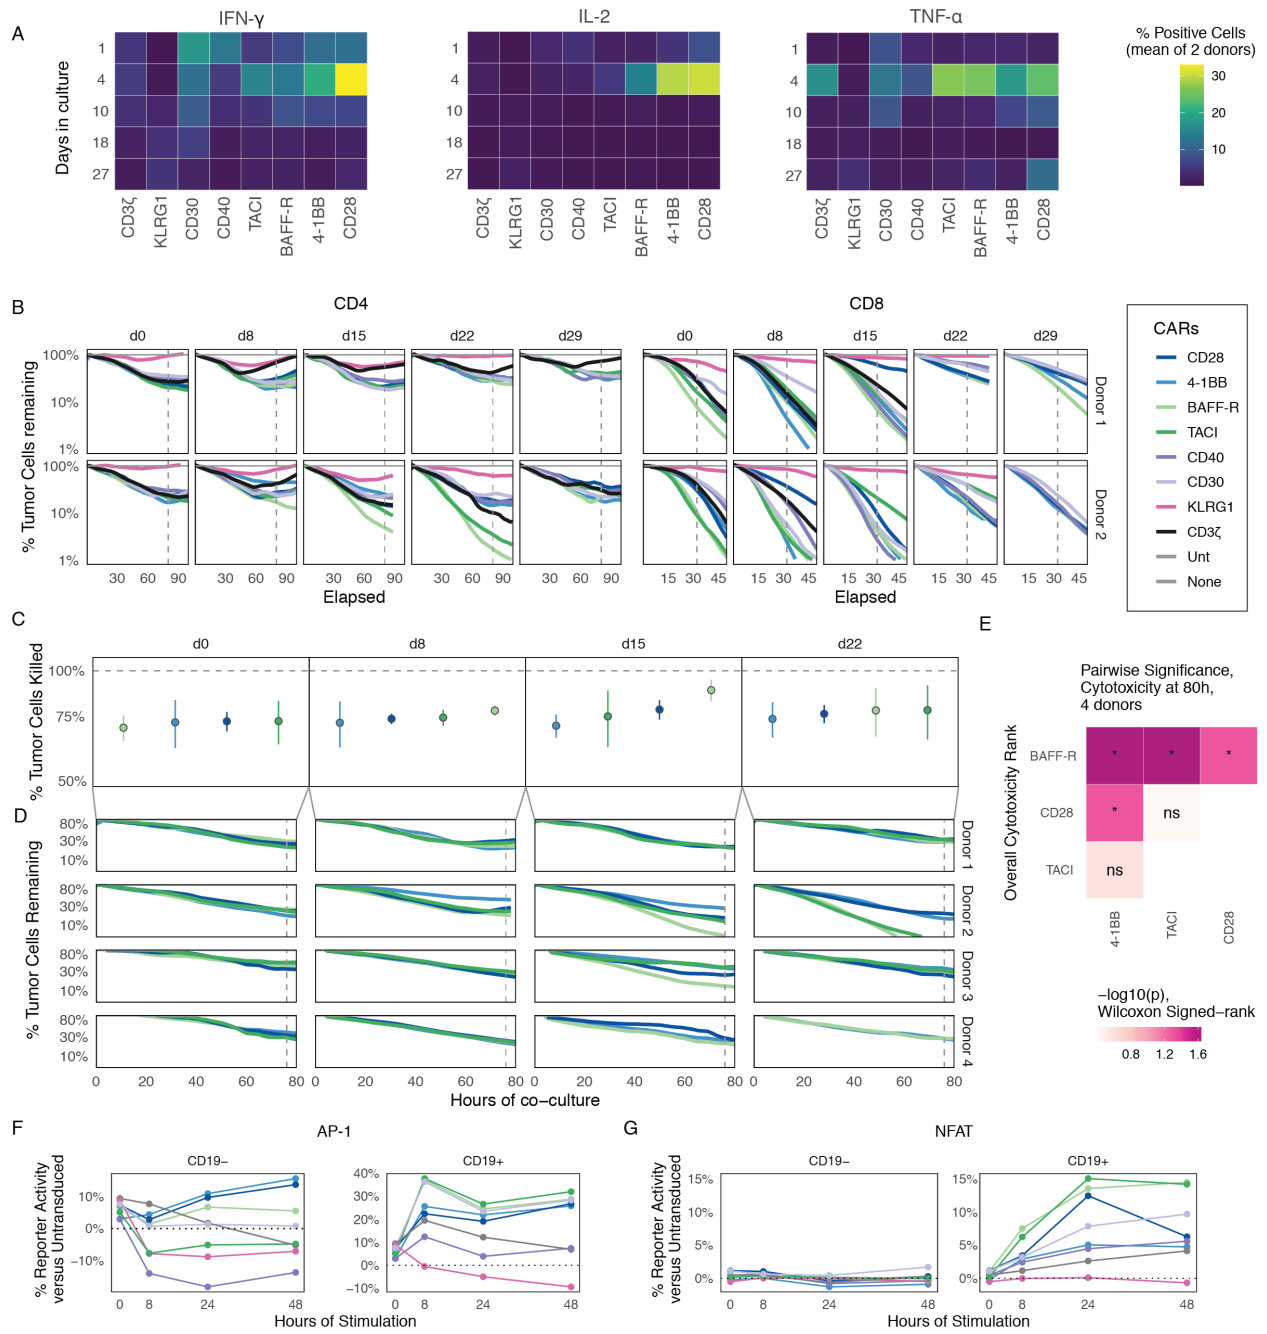

1

1 **Fig. S5. Time course of cytokine production, cytotoxicity, and transcriptional activity across**  
2 **CARs with chosen costimulatory domains.**

3 **(A)** Mean cytokine production is shown across all T cells, time points, and CAR T variants, as in  
4 Fig. 5B. **(B)** All cytotoxicity plots across both CD4 and CD8 donors and all measured days are  
5 shown as in Fig 5E. **(C)** Cytotoxicity of CAR T cells were quantified at 80 hours for all four CD4  
6 T cell donors (left) or at 32 hours for all CD8 T cell donors (right) expressing BAFF-R, TACI,  
7 CD28, or 4-1BB as in Fig. 5. Colors for each CAR are indicated in the legend. CARs are ranked  
8 at each timepoint from least to most cytotoxic (left to right). **(D)** Representative plots of  
9 cytotoxicity of CD4 CAR T cells from all four donors expressing BAFF-R, TACI, CD28, or 4-  
10 1BB are shown, with colors labeled as in (B). CARs are ranked at each timepoint from least to  
11 most cytotoxic (left to right). Vertical dashed lines indicate the time points analyzed in (C). Error  
12 bars indicate the standard error calculated across donors. **(E)** Table of significant differences in  
13 CD4 cytotoxicity shown in (D) using pairwise statistical tests across the chosen 4 donors and 4  
14 CARs. Significance scores are based on a Repeated Measures ANOVA model of percentage of  
15 cell killing at 80 hours across different donors and days of repetitive stimulation (FDR < 0.05.\*;  
16 ns, not significant). **(F)** Transcriptional activity reporter Jurkat cell lines for activator protein 1  
17 (AP-1) were transduced with each CAR and sorted within one log of GFP expression. The cells  
18 were stimulated with either CD19- or CD19+ K562 cells for 0, 8, 24, or 48 hours and then assessed  
19 for activity by flow cytometry. Percent transcription factor activity relative to untransduced  
20 reporter Jurkat cells is plotted on the y-axis. **(G)** Transcriptional activity reporter Jurkat cell lines  
21 for nuclear factor of activated T-cells (NFAT) as described in (F).

Figure S6

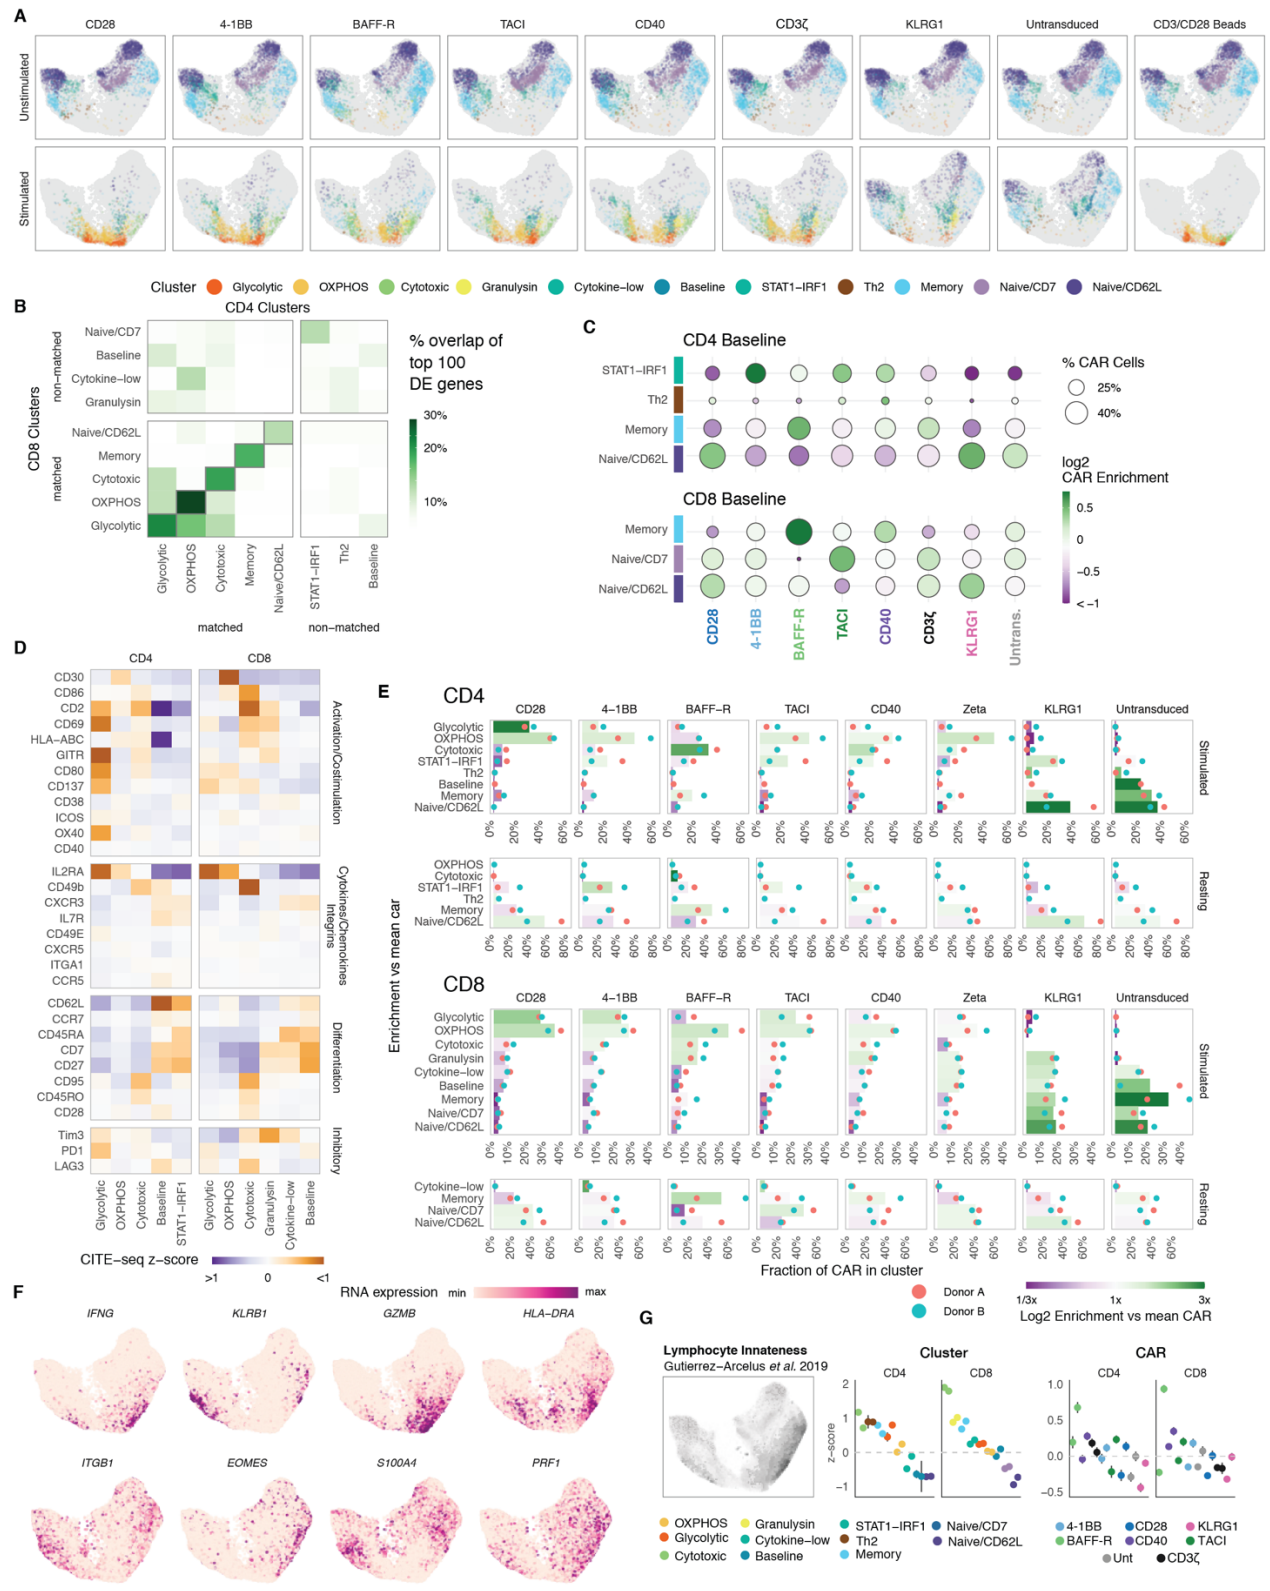

1

1 **Fig. S6. Single-cell analysis of CARs with chosen costimulatory domains with and without**  
2 **antigen stimulation.**

3 **(A)** Uniform manifold approximation and projection (UMAP) plots are faceted separately for each  
4 CAR costimulatory domain and stimulation condition. Points are colored the same as Fig. 6A. An  
5 additional CD3/CD28 bead stimulation condition is also shown, which was done only in Donor 2.  
6 **(B)** Gene expression overlap is shown across 5 pairs of clusters, which are very similar between  
7 CD4 and CD8 T cells (Naive/CD62L, Memory, Cytotoxic, OXPHOS, and Glycolytic). A list of  
8 the top 100 differentially expressed genes was calculated for each cluster among all CD4 or CD8  
9 T cells. This plot shows the percentage overlap in these gene lists between clusters, showing a  
10 mirroring of gene expression across the CD4-CD8 axis among the 5 matched clusters in the bottom  
11 left quadrant. **(C)** Enrichment of resting CAR T cells containing different signaling domains within  
12 each phenotypic cluster, similar to Fig. 6E. The size of each dot corresponds to the percentage of  
13 stimulated CAR T cells with a specific costimulatory domain that is assigned to a cluster. The  
14 color of each dot corresponds to the log-2 fold enrichment or depletion of that CAR within the  
15 cluster. **(D)** Cellular indexing of transcriptomes and epitopes by sequencing (CITE-seq) z-scores  
16 are shown for a variety of surface proteins among T cells in different activated clusters, grouped  
17 by their functional classification. Z-scores for CD4 and CD8 T cells were calculated separately.  
18 **(E)** A breakdown of the cluster frequency is shown among all stimulated and resting CAR variants  
19 of both donors. The bar length on the x-axis is the percentage of each costimulatory CAR variant  
20 (resting and stimulated separately) within that cluster, such that each set of bars within each faceted  
21 box sums to 1. The bars represent the mean percentage for both donors, and the blue and red dots  
22 represent the individual percentages for each donor. The color of each bar corresponds to the  
23 relative log2 enrichment for that CAR variant in that cluster, relative to other CAR variants. **(F)**  
24 UMAP heatmaps display the relative RNA expression of single cells (scaled individually),  
25 showing a subset of functionally-important transcripts that are upregulated in the Cytotoxic and  
26 Memory subsets. **(G)** Correlation of T cell gene signatures indicative of lymphocyte innateness,  
27 based on Gutierrez-Arcelus *et al.* (64) (left) with phenotypic clusters in CD4 and CD8 CAR T cells  
28 (middle) or with CARs containing different costimulatory domains (right). Cluster and CAR colors  
29 match those in Fig. 6F. The two dots per group correspond to donors A and B. Error bars indicate  
30 99% confidence intervals for the z-scores.

Figure S7

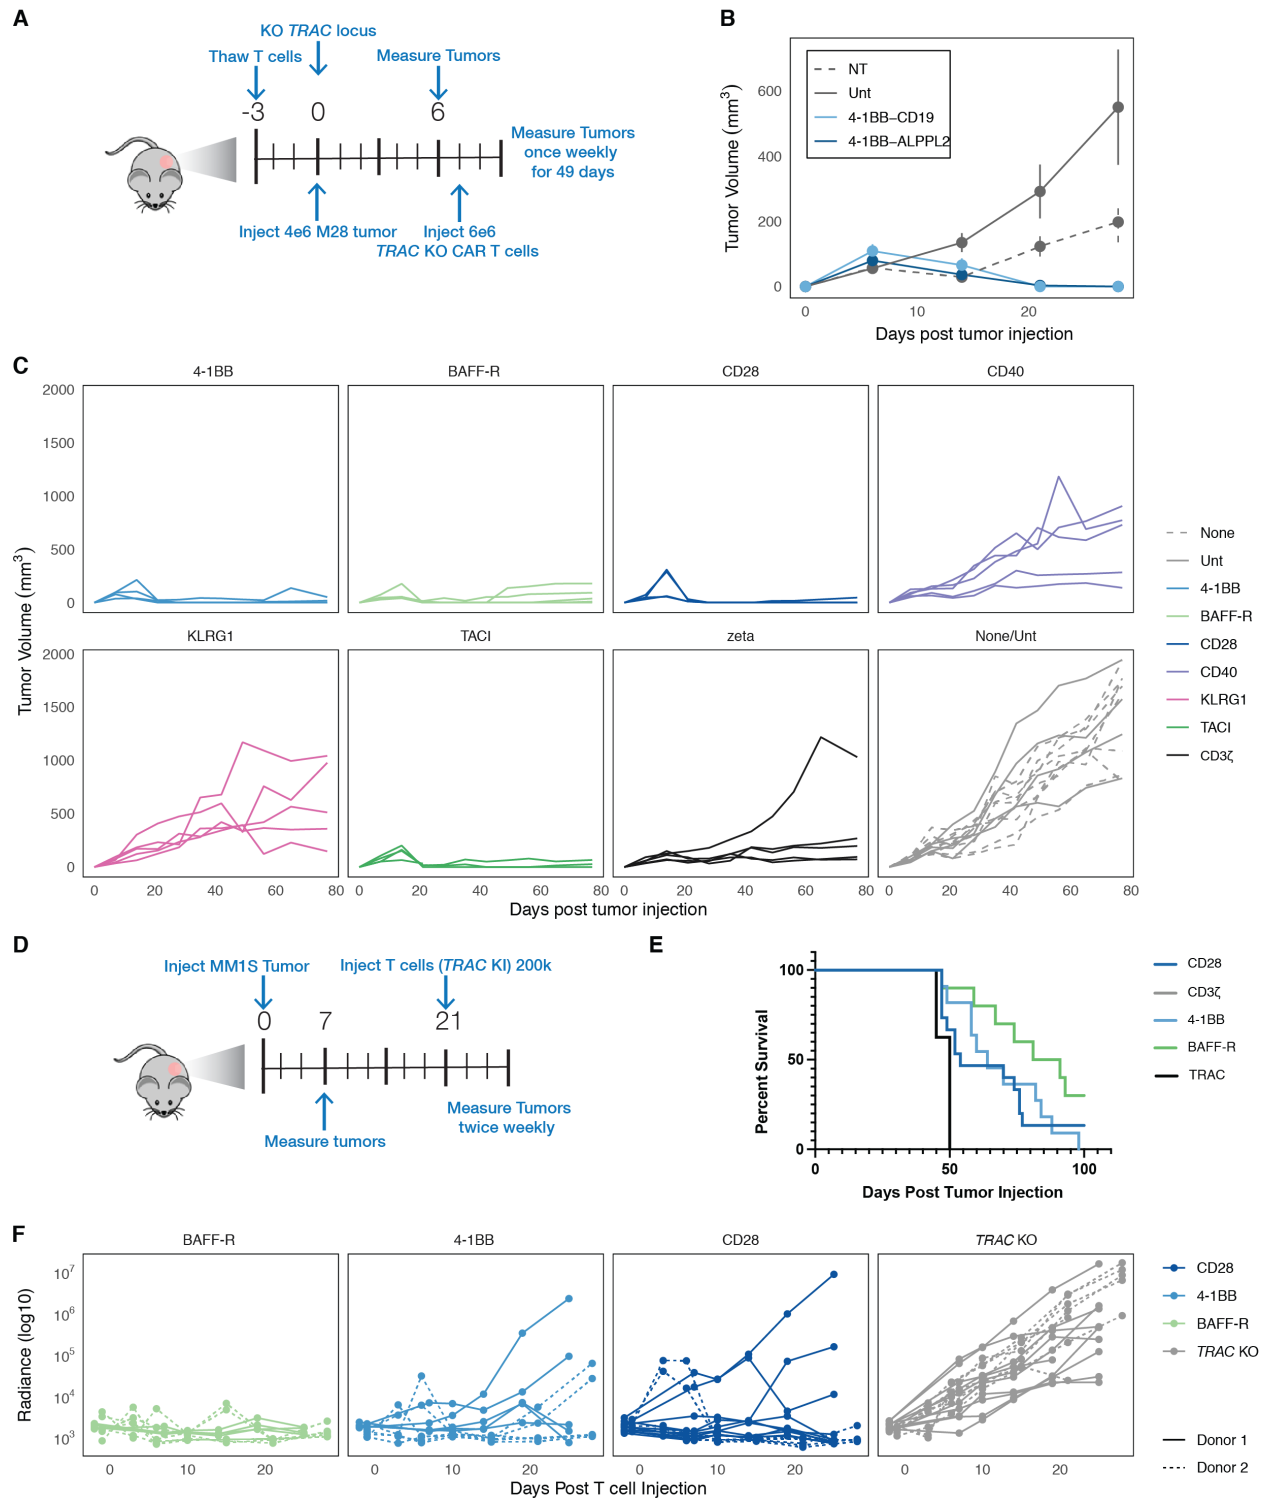

1 **Fig S7. In vivo efficacy of highlighted signaling domains in the M28 and MM1S cancer**  
2 **models.**

3 **(A)** Experimental timeline for in vivo M28 mesothelioma tumor model. We injected  $4 \times 10^6$  CD19+  
4 M28 mesothelioma tumor cells subcutaneously into the flanks of NOD.Cg-Prkdc scid Il2rg  
5 tm1Wjl /SzJ (NSG) mice and, seven days later, transferred  $6 \times 10^6$  engineered *TRAC* knockout (KO)  
6 CAR T cells targeting CD19 intravenously into the tail vein. Tumors were measured by caliper  
7 every 7 days for a total of 49 days. **(B)** Tumor burden was measured in mice treated with CAR T  
8 cells targeting either ALPPL2 or CD19. Untransduced (Unt) T cells and non-treated (NT) mice  
9 were included as controls. Tumors were measured by caliper every 7 days for a total of 30 days.  
10 Error bars indicate standard error of the mean for tumor volumes across mice. **(C)** M28 tumor  
11 volume was plotted over time for individual mice, corresponding to the mean tumor volumes in  
12 Fig. 7A and B. **(D)** Experimental timeline for in vivo MM1S multiple myeloma tumor model is  
13 shown. We injected  $1 \times 10^6$  MM1S multiple myeloma tumor cells intravenously into NSG mice  
14 and, three weeks later, transferred 200,000 engineered *TRAC*-knockin CAR T cells targeting  
15 BCMA intravenously into the tail vein. **(E)** Survival curves are shown for mice treated with CAR  
16 T cells derived from Donor 1 and Donor 2 in the MM1S tumor model; results were combined for  
17 both donors. Mice were monitored over 100 days. **(F)** MM1S tumor volume is shown plotted over  
18 time for individual mice in all treatments, corresponding to Fig. 7C.

19  
20  
21  
22  
23  
24  
25  
26  
27  
28  
29  
30  
31



1

2 **Table S1. Expression of individual signaling domains by receptor type.**

3 The table shows a list of all costimulatory domains in our library and whether they are expressed  
4 by different immune cell types. Note that some receptors may have low expression or may only be  
5 expressed under specific circumstances by individual cell types.

**Supplemental Table 1. Expression of individual cosignaling receptors by cell type**

| Cosignaling Receptor | T cel | B cel | NK cel | DC C | Macrophag | NKT C | Granulocy | Microgl | Total Cell Types |
|----------------------|-------|-------|--------|------|-----------|-------|-----------|---------|------------------|
| 41BB                 | X     |       |        |      |           |       |           |         | 1                |
| BAFF-R               | X     | X     |        |      |           |       |           |         | 2                |
| BCMA                 |       | X     |        |      |           |       |           |         | 1                |
| BTLA                 | X     | X     |        |      |           |       |           |         | 2                |
| CD2                  | X     |       | X      |      |           |       |           |         | 2                |
| CD200R               | X     |       |        |      |           |       | X         |         | 2                |
| CD244                | X     |       | X      |      |           |       | X         |         | 3                |
| CD28                 | X     | X     |        |      |           |       | X         |         | 3                |
| CD300a               | X     | X     | X      | X    |           |       | X         |         | 5                |
| CD300f               |       |       |        |      |           |       |           |         | 0                |
| CD40                 |       | X     |        |      | X         |       |           |         | 2                |
| CD7                  | X     |       | X      |      |           |       |           |         | 2                |
| CD72                 |       | X     |        |      |           |       |           |         | 1                |
| CD96                 | X     |       | X      |      |           |       |           |         | 2                |
| CRACC                | X     | X     | X      |      |           |       |           |         | 3                |
| CRTAM                | X     |       |        |      |           | X     |           |         | 2                |
| CTLA4                | X     | X     |        |      |           |       | X         |         | 3                |
| CXADR                |       |       |        |      |           |       |           |         | 0                |
| DC-SIGN              |       |       |        | X    |           |       |           |         | 1                |
| GITR                 | X     |       | X      |      |           |       |           |         | 2                |
| TIM3                 | X     |       | X      | X    |           |       |           |         | 3                |
| ICOS                 | X     |       |        |      |           |       |           |         | 1                |
| ILT2                 |       | X     | X      | X    | X         |       |           |         | 4                |
| ILT3                 |       | X     | X      | X    | X         |       |           |         | 4                |
| ILT4                 |       | X     | X      | X    |           |       |           |         | 3                |
| KIR2DL1              |       |       | X      |      |           |       |           |         | 1                |
| KIR3DL1              | X     |       | X      |      |           |       |           |         | 2                |
| KLRG1                | X     |       | X      |      |           |       |           |         | 2                |
| LAG3                 | X     |       | X      |      |           |       |           |         | 2                |
| LAIR1                | X     | X     | X      | X    |           |       |           |         | 4                |
| NKG2D                | X     |       | X      | X    |           |       |           |         | 3                |
| NKR-P1A              | X     |       | X      |      |           |       |           |         | 2                |
| NTB-A                | X     | X     | X      | X    |           |       |           |         | 4                |
| PD1                  | X     | X     | X      | X    | X         |       |           | X       | 6                |
| Siglec-3             |       |       |        | X    |           |       |           | X       | 2                |
| TACI                 | X     | X     |        |      |           |       |           |         | 2                |
| TIGIT                | X     |       | X      |      |           |       |           |         | 2                |
| TLT-1                |       |       |        |      |           |       |           |         | 0                |
| CD30                 | X     | X     | X      |      | X         |       |           |         | 4                |

1  
2

1 **Table S2. List of reagents used in this study.**

| <b>Reagent</b>                                           | <b>Source</b>     | <b>Catalog Number</b>          |
|----------------------------------------------------------|-------------------|--------------------------------|
| <i>Antibodies</i>                                        |                   |                                |
| Monoclonal anti-human CD197(CCR7)-PE/Cy7 (clone G043H7)  | BioLegend         | Cat# 353226, RRID: AB_11126145 |
| Monoclonal anti-human CD223(LAG-3)-AF647 (clone 11C3C65) | BioLegend         | Cat# 369304, RRID: AB_2566480  |
| Monoclonal anti-human CD27-APC/Cyanine7 (clone M-T271)   | BioLegend         | Cat# 356424, RRID: AB_2566773  |
| Monoclonal anti-human CD297(PD-1)-BV711 (clone EH12.2H7) | BioLegend         | Cat# 329928, RRID: AB_2562911  |
| Monoclonal anti-human CD366(Tim-3)-BV421 (clone F38-2E2) | BioLegend         | Cat# 345008, RRID: AB_11218598 |
| Monoclonal anti-human CD39-APC/Cyanine7 (clone A1)       | BioLegend         | Cat# 328226, RRID: AB_2571981  |
| Monoclonal anti-human CD4-PE (clone OKT4)                | BioLegend         | Cat# 317410, RRID: AB_571955   |
| Monoclonal anti-human CD4-PE (clone SK3)                 | BioLegend         | Cat# 344606, RRID: AB_1937246  |
| Monoclonal anti-human CD4-BUV395 (clone SK3)             | BD<br>Biosciences | Cat# 563552                    |
| Monoclonal anti-human CD4-Pacific Blue (clone SK3)       | BioLegend         | Cat# 344620, RRID: AB_2228841  |
| Monoclonal anti-human CD45RA-APC (clone HI100)           | BioLegend         | Cat# 304112, RRID: AB_314416   |
| Monoclonal anti-human CD45RO-BUV395 (clone UCHL1)        | BD<br>Biosciences | Cat# 564291                    |
| Monoclonal anti-human CD62L-BV785 (clone DREG-56)        | BioLegend         | Cat# 304830, RRID: AB_2629555  |

|                                                          |                                 |                                |
|----------------------------------------------------------|---------------------------------|--------------------------------|
| Monoclonal anti-human CD8-PE (clone SK1)                 | BioLegend                       | Cat# 344706, RRID: AB_1953244  |
| Monoclonal anti-human CD8-BUV395 (clone RPA-T8)          | BD<br>Biosciences               | Cat# 563795                    |
| Monoclonal anti-human CD8-Pacific Blue (clone SK1)       | BioLegend                       | Cat# 344718, RRID: AB_10551438 |
| Monoclonal anti-human CD95-BV711 (clone DX2)             | BioLegend                       | Cat# 305644, RRID: AB_2632623  |
| Monoclonal anti-human c-Myc-AF594 (clone 9B11)           | Cell<br>Signaling<br>Technology | Cat# 9483S                     |
| Monoclonal anti-human IFN- $\gamma$ -BV786 (clone 4S.B3) | BD<br>Biosciences               | Cat# 563731                    |
| Monoclonal anti-human IL-2-APC (clone MQ1-17H12)         | BD<br>Biosciences               | Cat# 554567                    |
| Monoclonal anti-human TNF-BUV395 (clone MAb11)           | BD<br>Biosciences               | Cat# 563996                    |
| TotalSeq-A0251 HT1                                       | BioLegend                       | Cat# 394601                    |
| TotalSeq-A0252 HT2                                       | BioLegend                       | Cat# 394603                    |
| TotalSeq-A0253 HT3                                       | BioLegend                       | Cat# 394605                    |
| TotalSeq-A0254 HT4                                       | BioLegend                       | Cat# 394607                    |
| TotalSeq-A0255 HT5                                       | BioLegend                       | Cat# 394609                    |
| TotalSeq-A0256 HT6                                       | BioLegend                       | Cat# 394611                    |
| TotalSeq-A0257 HT7                                       | BioLegend                       | Cat# 394613                    |
| TotalSeq-A0258 HT8                                       | BioLegend                       | Cat# 394615                    |
| TotalSeq-A0259 HT9                                       | BioLegend                       | Cat# 394617                    |
| TotalSeq-A0260 HT10                                      | BioLegend                       | Cat# 394619                    |
| TotalSeq-A0262 HT12                                      | BioLegend                       | Cat# 394623                    |
| TotalSeq-A0263 HT13                                      | BioLegend                       | Cat# 394625                    |
| ABSeq Oligo Mouse Monoclonal anti-                       | BD                              | Cat# 940046                    |

|                                                |                   |             |
|------------------------------------------------|-------------------|-------------|
| human CD2                                      | Biosciences       |             |
| ABSeq Oligo Mouse Monoclonal anti-human CD3    | BD<br>Biosciences | Cat# 940000 |
| ABSeq Oligo Mouse Monoclonal anti-human CD183  | BD<br>Biosciences | Cat# 940030 |
| ABSeq Oligo Mouse Monoclonal anti-human CD103  | BD<br>Biosciences | Cat# 940067 |
| ABSeq Oligo Mouse Monoclonal anti-human CD270  | BD<br>Biosciences | Cat# 940097 |
| ABSeq Oligo Mouse Monoclonal anti-human CD54   | BD<br>Biosciences | Cat# 940072 |
| ABSeq Oligo Mouse Monoclonal anti-human CD45RA | BD<br>Biosciences | Cat# 940011 |
| ABSeq Oligo Mouse Monoclonal anti-human CD197  | BD<br>Biosciences | Cat# 940014 |
| ABSeq Oligo Mouse Monoclonal anti-human CD11a  | BD<br>Biosciences | Cat# 940077 |
| ABSeq Oligo Mouse Monoclonal anti-human CD194  | BD<br>Biosciences | Cat# 940047 |
| ABSeq Oligo Mouse Monoclonal anti-human CD336  | BD<br>Biosciences | Cat# 940085 |
| ABSeq Oligo Mouse Monoclonal anti-human CD126  | BD<br>Biosciences | Cat# 940090 |
| ABSeq Oligo Mouse Monoclonal anti-human CD123  | BD<br>Biosciences | Cat# 940020 |
| ABSeq Oligo Mouse Monoclonal anti-human CD5    | BD<br>Biosciences | Cat# 940038 |
| ABSeq Oligo Mouse Monoclonal anti-human CD196  | BD<br>Biosciences | Cat# 940033 |
| ABSeq Oligo Mouse Monoclonal anti-             | BD                | Cat# 940089 |

|                                               |                   |             |
|-----------------------------------------------|-------------------|-------------|
| human CD178                                   | Biosciences       |             |
| ABSeq Oligo Mouse Monoclonal anti-human CD24  | BD<br>Biosciences | Cat# 940028 |
| ABSeq Oligo Mouse Monoclonal anti-human CD56  | BD<br>Biosciences | Cat# 940007 |
| ABSeq Oligo Mouse Monoclonal anti-human CD124 | BD<br>Biosciences | Cat# 940092 |
| ABSeq Oligo Mouse Monoclonal anti-human CD185 | BD<br>Biosciences | Cat# 940042 |
| ABSeq Oligo Mouse Monoclonal anti-human CD18  | BD<br>Biosciences | Cat# 940086 |
| ABSeq Oligo Mouse Monoclonal anti-human IgG   | BD<br>Biosciences | Cat# 940027 |
| ABSeq Oligo Mouse Monoclonal anti-human CD127 | BD<br>Biosciences | Cat# 940012 |
| ABSeq Oligo Mouse Monoclonal anti-human CD25  | BD<br>Biosciences | Cat# 940009 |
| ABSeq Oligo Mouse Monoclonal anti-human CD13  | BD<br>Biosciences | Cat# 940044 |
| ABSeq Oligo Mouse Monoclonal anti-human CD1c  | BD<br>Biosciences | Cat# 940083 |
| ABSeq Oligo Mouse Monoclonal anti-human CD278 | BD<br>Biosciences | Cat# 940043 |
| ABSeq Oligo Mouse Monoclonal anti-human CD274 | BD<br>Biosciences | Cat# 940035 |
| ABSeq Oligo Mouse Monoclonal anti-human CD11b | BD<br>Biosciences | Cat# 940008 |
| ABSeq Oligo Mouse Monoclonal anti-human CD49a | BD<br>Biosciences | Cat# 940094 |
| ABSeq Oligo Mouse Monoclonal anti-            | BD                | Cat# 940024 |

|                                                |                   |             |
|------------------------------------------------|-------------------|-------------|
| human CD11c                                    | Biosciences       |             |
| ABSeq Oligo Mouse Monoclonal anti-human CD62L  | BD<br>Biosciences | Cat# 940041 |
| ABSeq Oligo Mouse Monoclonal anti-human CD279  | BD<br>Biosciences | Cat# 940015 |
| ABSeq Oligo Mouse Monoclonal anti-human CD195  | BD<br>Biosciences | Cat# 940050 |
| ABSeq Oligo Mouse Monoclonal anti-human CD69   | BD<br>Biosciences | Cat# 940019 |
| ABSeq Oligo Mouse Monoclonal anti-human CD335  | BD<br>Biosciences | Cat# 940064 |
| ABSeq Oligo Mouse Monoclonal anti-human CD49b  | BD<br>Biosciences | Cat# 940087 |
| ABSeq Oligo Mouse Monoclonal anti-human CD184  | BD<br>Biosciences | Cat# 940056 |
| ABSeq Oligo Mouse Monoclonal anti-human CD30   | BD<br>Biosciences | Cat# 940103 |
| ABSeq Oligo Mouse Monoclonal anti-human CD10   | BD<br>Biosciences | Cat# 940045 |
| ABSeq Oligo Mouse Monoclonal anti-human CD223  | BD<br>Biosciences | Cat# 940080 |
| ABSeq Oligo Mouse Monoclonal anti-human CD61   | BD<br>Biosciences | Cat# 940065 |
| ABSeq Oligo Mouse Monoclonal anti-human IL-21R | BD<br>Biosciences | Cat# 940099 |
| ABSeq Oligo Mouse Monoclonal anti-human CD90   | BD<br>Biosciences | Cat# 940032 |
| ABSeq Oligo Mouse Monoclonal anti-human CD80   | BD<br>Biosciences | Cat# 940036 |
| ABSeq Oligo Mouse Monoclonal anti-             | BD                | Cat# 940081 |

|                                                                  |                            |              |
|------------------------------------------------------------------|----------------------------|--------------|
| human CD94                                                       | Biosciences                |              |
| ABSeq Oligo Mouse Monoclonal anti-human CD226                    | BD<br>Biosciences          | Cat# 940075  |
| ABSeq Oligo Mouse Monoclonal anti-human HLA-ABC                  | BD<br>Biosciences          | Cat# 940062  |
| ABSeq Oligo Mouse Monoclonal anti-human TCRgd                    | BD<br>Biosciences          | Cat# 940057  |
| ABSeq Oligo Mouse Monoclonal anti-human CD86                     | BD<br>Biosciences          | Cat# 940025  |
| ABSeq Oligo Mouse Monoclonal anti-human CD155                    | BD<br>Biosciences          | Cat# 940102  |
| ABSeq Oligo Mouse Monoclonal anti-human CD206                    | BD<br>Biosciences          | Cat# 940068  |
| ABSeq Oligo Mouse Monoclonal anti-human CD117                    | BD<br>Biosciences          | Cat# 940051  |
| ABSeq Oligo Mouse Monoclonal anti-human CD95                     | BD<br>Biosciences          | Cat# 940037  |
| ABSeq Oligo Mouse Monoclonal anti-human CD9                      | BD<br>Biosciences          | Cat# 940078  |
| <u><i>Bacterial and Virus Strains</i></u>                        |                            |              |
| <i>Escherichia coli</i> : strain HST08 (Stellar Competent Cells) | Takara Bio                 | Cat# 636766  |
| NEB 5-alpha Electrocompetent E. coli                             | New England<br>Biosciences | Cat # C2989  |
| <u><i>Biological Samples</i></u>                                 |                            |              |
| T Cells from Donor D001004304                                    | STEMCELL<br>Technologies   | Cat# 70500.2 |
| T Cells from Donor RG1765                                        | STEMCELL<br>Technologies   | Cat# 70500.1 |



|                                               |                              |                 |
|-----------------------------------------------|------------------------------|-----------------|
| T Cells from Donor RV01000251                 | STEMCELL<br>Technologies     | Cat# 70500.1    |
| T Cells from Donor RG1310                     | STEMCELL<br>Technologies     | Cat# 70500.1    |
| T Cells from Donor RG1945                     | STEMCELL<br>Technologies     | Cat# 70500.1    |
| Chemicals, Peptides, and Recombinant Proteins |                              |                 |
| Recombinant Human IL-2 Protein                | R&D<br>Systems               | Cat# 202-IL-500 |
| Acetic acid, glacial                          | Sigma-<br>Aldrich            | Cat# ARK2183-1L |
| CellTrace Violet                              | Thermo<br>Fisher             | Cat# C34557     |
| eBioscience Brefeldin A Solution<br>(1000X)   | Invitrogen                   | Cat# 00-4506-51 |
| Zombie Yellow Fixable Viability Kit           | BioLegend                    | Cat# 423104     |
| Dulbecco's Phosphate Buffered Saline          | Sigma-<br>Aldrich            | Cat# D8537      |
| X-VIVO 15                                     | Lonza<br>Bioscience          | Cat# 04-418Q    |
| Human AB Serum Heat Inactivated               | Valley<br>Biomedical,<br>Inc | Cat# HP1022HI   |
| N-Acetyl-L-Cysteine                           | Sigma-<br>Aldrich            | Cat# A9165      |
| 1.0N NaOH                                     | Sigma-<br>Aldrich            | Cat# S2770      |
| 2-Mercaptoethanol                             | Gibco                        | Cat# 21985-023  |
| RPMI 1640 Medium                              | Gibco                        | Cat# 11875-093  |
| Glutamax                                      | Fisher                       | Cat# 35050061   |

|                                                                     |                          |                   |
|---------------------------------------------------------------------|--------------------------|-------------------|
|                                                                     | Scientific               |                   |
| Fetal Bovine Serum (Heat Inactivated)                               | SAFC<br>Biosciences      | Cat# 12306C-500ML |
| Penicillin-Streptomycin (10,000 IU/mL,<br>10,000 µg/mL)             | MP<br>Biomedicals        | Cat# 1670249      |
| InFusion                                                            | Takara Bio               | Cat# 638951       |
| EasySep Human CD4+ T Cell Isolation<br>Kit                          | STEMCELL<br>Technologies | Cat# 17952        |
| EasySep Human CD8+ T Cell Isolation<br>Kit                          | STEMCELL<br>Technologies | Cat# 17953        |
| EasySep Human T Cell Negative<br>Isolation Kit                      | STEMCELL<br>Technologies | Cat # 17951       |
| Cyto-Last Buffer                                                    | BioLegend                | Cat# 422501       |
| NucleoSpin Tissue XS                                                | Macherey-<br>Nagel       | Cat# 740901.50    |
| NucleoSpin                                                          | Macherey-<br>Nagel       | Cat# 740952.50S   |
| NucleoSpin 96 Tissue                                                | Macherey-<br>Nagel       | Cat# 740741.4     |
| TaKaRa Ex Taq DNA Polymerase                                        | Takara Bio               | Cat# RR001B       |
| MiniSeq High Output Reagent Kit (150-<br>cycles)                    | Illumina                 | Cat# FC-420-1002  |
| HiSeq 4000 300 Cycle Kit                                            | Illumina                 | Cat# FC-410-1003  |
| eBioscience Intracellular Fixation &<br>Permeabilization Buffer Set | Invitrogen               | Cat# 88-8824-00   |
| <i>Experimental Models: Cell Lines</i>                              |                          |                   |
| Human: HEK293T                                                      | ATCC                     |                   |
| Human: K562<br>(CD19+mCherry+)                                      | Lim Lab,<br>UCSF         |                   |
| Human: Nalm6                                                        | Eyquem Lab,              |                   |

|                                                                     |                                                   |                                                                                                                       |
|---------------------------------------------------------------------|---------------------------------------------------|-----------------------------------------------------------------------------------------------------------------------|
| (CD19+GFP+Luciferase+)                                              | UCSF                                              |                                                                                                                       |
| Human: M28                                                          | Gerwin Lab,<br>NCI/NIH                            |                                                                                                                       |
| <i>Experimental Models: Organisms/Strains</i>                       |                                                   |                                                                                                                       |
| Mouse: NOD.Cg-Prkdc <sup>scid</sup><br>IL2rg <sup>tm1Wjl</sup> /Szj | The Jackson<br>Laboratory                         | JAX: 005557                                                                                                           |
| Software and Algorithms                                             |                                                   |                                                                                                                       |
| FlowJo version 10                                                   | FlowJo, LLC                                       | <a href="https://www.flowjo.com">https://www.flowjo.com</a>                                                           |
| RStudio                                                             | RStudio                                           | <a href="https://rstudio.com/">https://rstudio.com/</a>                                                               |
| IncuCyte Base Software                                              | Essen<br>Bioscience<br>(now part of<br>Sartorius) | <a href="https://www.essenbioscience.com/en/">https://www.essenbioscience.com/en/</a>                                 |
| Living Image                                                        | PerkinElmer                                       | <a href="https://www.perkinelmer.com">https://www.perkinelmer.com</a>                                                 |
| Prism version 9                                                     | Graph Pad                                         | <a href="https://www.graphpad.com/scientific-software/prism/">https://www.graphpad.com/scientific-software/prism/</a> |
| <i>Other</i>                                                        |                                                   |                                                                                                                       |
| Poly(A), Polyadenylic acid                                          | Roche                                             | Cat# 10108626001                                                                                                      |
| Dynabeads Human T-Activator<br>CD3/CD28                             | Thermo<br>Fisher                                  | Cat# 11131D                                                                                                           |
| CountBright Absolute Counting Beads                                 | Invitrogen                                        | Cat# C36950                                                                                                           |
| OneComp eBeads Compensation Beads                                   | Invitrogen                                        | Cat# 01-1111-42                                                                                                       |

1  
2

1 **Data file S1. T Cell Donor Demographic and Processing Information.**

2

3 **Data file S2. Raw, individual level data for experiments where  $n < 20$ .**

4
